# Supplementary material for: Network complexity of rubber plantations is lower than tropical forests for soil bacteria but not for fungi
Source: Copernicus journal article supplement (doi:10.5194/soil-8-149-2022), 2022-03-02
Supplement: Supplementary file 1 [file soil-8-149-2022-supplement.pdf]

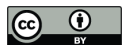

*Supplement of*

**Network complexity of rubber plantations is lower than tropical forests for soil bacteria but not for fungi**

**Guoyu Lan et al.**

*Correspondence to:* Guoyu Lan (langyrri@163.com)

The copyright of individual parts of the supplement might differ from the article licence.

11 **Figure S1** Rainforest (solid blue hexagons) and rubber plantation (solid red triangles)  
 12 study sites on Hainan Island.

13 **Figure S2** Relationship between network properties and OTU abundance of rubber  
 14 plantations and tropical rainforest sites across season. The size of the node indicates the  
 15 OTU abundance.

16 **Figure S3**  $Z_i$ - $P_i$  plot showing the topological distribution of OTUs in the bacterial  
 17 networks. Each point represents a fungal OTU. Threshold values of  $Z_i$  and  $P_i$  for the  
 18 classification are 2.5 and 0.62, respectively. The size of the node indicates the OTU  
 19 abundance.

20 **Figure S4**  $Z_i$ - $P_i$  plot showing the topological distribution of OTUs in the fungal  
 21 networks. Each point represents a fungal OTU. Threshold values of  $Z_i$  and  $P_i$  for the  
 22 classification are 2.5 and 0.62, respectively. The size of the node indicates the OTU  
 23 abundance.

24 **Figure S5** Two ways correlation network of top 500 most abundant bacterial (A) and  
 25 fungal (B) OTUs and environmental factors. The size of the node indicates the OTU  
 26 abundance. A red line indicates positive correlation between species/functions, and  
 27 green indicates negative correlation. Absolute value of correlation coefficient  $> 0.5$ ,  $P$   
 28  $< 0.01$ .

29 **Figure S6** Relationship between abundance of phylum (bacteria: A-E, I-M; fungi: F-H,  
 30 N-P) and soil properties (Soil pH: A-H; AK (available potassium) concentration: I-P)

31 **Figure S7** Network degree of soil bacterial and fungal community of rubber plantations  
 32 (blue) and tropical rainforest (red) in the dry and rainy seasons (A: bacteria in dry

33 season, B: bacteria in rainy season, C: fungal in dry season, D: fungal in rainy season)

34 **Figure S8** Phylum composition of the soil fungal community of rubber plantations and  
35 tropical rainforest sites across seasons.

36 **Figure S9** Phylum composition of the soil bacterial community of rubber plantations  
37 and tropical rainforest sites across seasons.

38

39 **Table S1** Site characteristics for rubber plantation and tropical rainforest sites.

40 **Table S2** Soil properties and environmental factors for study rubber plantation and  
41 tropical rainforest sites on Hainan Island.

42 **Table S3** Keystone bacterial taxa in the overall network. keystones were selected on  
43 the basis of high degree, high closeness centrality and low betweenness centrality (for  
44 dry season: cut-off: degree > 45 and CC >0.42 and BC <0.030, for rainy season: cut-  
45 off: degree >72 and CC >0.45 and BC <0.020) according to Berry and Widder (2014).

46 **Table S4** Keystone fungal taxa in the overall network. keystones were selected on the  
47 basis of high degree, high closeness centrality and low betweenness centrality (for dry  
48 season: cut-off: degree >25 and CC >0.25 and BC < 0.06, for rainy season: cut-off:  
49 degree >30 and CC >0.32 and BC <0.040) according to Berry and Widder (2014).

50

51 **Table S1** Site characteristics for rubber plantation and tropical rainforest sites.

| Forest type          | Site              | Longitude | Latitude | Elevation<br>(m) | Mean annual<br>precipitation (mm) | Mean annual<br>temperature (°C) |
|----------------------|-------------------|-----------|----------|------------------|-----------------------------------|---------------------------------|
| Rubber<br>plantation | Danzhou (DZ)      | 109.5789  | 19.5628  | 112              | 1831.53                           | 23.60                           |
| Rubber<br>plantation | Qiongzong<br>(QZ) | 109.7387  | 19.2633  | 156              | 2067.33                           | 23.45                           |
| Rubber<br>plantation | Ledong (LD)       | 109.2231  | 18.7534  | 170              | 1661.26                           | 24.46                           |
| Rubber<br>plantation | Wanning (WN)      | 110.132   | 18.6749  | 51               | 1786.46                           | 24.7                            |
| Rubber<br>plantation | Haikou (HK)       | 110.5723  | 19.6977  | 102              | 1863.38                           | 24.16                           |
| Rainforest           | Diaoluo (DL)      | 109.864   | 18.7277  | 958              | 1921.27                           | 24.17                           |
| Rainforest           | Jianfeng (JF)     | 108.8834  | 18.7273  | 950              | 1392.34                           | 24.69                           |
| Rainforest           | Bawang (BW)       | 109.1277  | 19.0842  | 575              | 1602.12                           | 24.31                           |
| Rainforest           | Yingge (YG)       | 109.5598  | 19.0467  | 620              | 2067.77                           | 23.55                           |
| Rainforest           | Wuzhi (WZ)        | 109.6812  | 18.9059  | 820              | 2173.82                           | 23.42                           |

52

53

54 **Table S2** Soil properties and environmental factors for rubber plantation and tropical rainforest study sites on Hainan Island.

| Vegetation type   | WC<br>(%)  | SOM<br>(%) | Soil pH   | AN<br>(mg/kg) | NN<br>(mg/kg) | AP<br>(mg/kg) | AK<br>(g/kg) | TN<br>(g/kg) | TP<br>(g/kg) | TK<br>(g/kg) | Elevation<br>(m) | Rainfall<br>(mm) | Temperature<br>(℃) |
|-------------------|------------|------------|-----------|---------------|---------------|---------------|--------------|--------------|--------------|--------------|------------------|------------------|--------------------|
| Rubber plantation | 29.20±9.77 | 1.56±0.88  | 4.79±0.44 | 12.39±6.03    | 7.59±4.31     | 4.03± 3.34    | 29.37±15.35  | 1.28±0.65    | 0.30±0.37    | 13.09±11.24  | 118.20±42.42     | 1841.99±132.49   | 24.07±0.48         |
| Rainforest        | 31.63±9.79 | 2.92±0.90  | 4.59±0.59 | 15.31±5.49    | 13.01±6.75    | 4.13±3.72     | 78.58±39.67  | 2.08±0.94    | 0.18±0.13    | 15.69±7.80   | 784.60±161.68    | 1831.46±293.21   | 24.03±0.48         |

55

56

57 **Table S3** Keystone bacterial taxa in the overall network. Keystones were selected on the basis of high degree, high closeness centrality and low  
58 betweenness centrality (for dry season: cut-off: degree >45 and CC >0.42 and BC <0.030, for rainy season: cut-off: degree >72 and CC >0.45 and  
59 BC <0.020) according to Berry and Widder (2014).

| Forest systems | Season | OTU ID   | Abundance | Genus                        | Phylum          | Betweenness Centrality | Closeness Centrality | Degree |
|----------------|--------|----------|-----------|------------------------------|-----------------|------------------------|----------------------|--------|
| Rubber         | Dry    | OTU7157  | 4249      | norank_o__Acidimicrobiales   | Actinobacteria  | 0.029                  | 0.441                | 50     |
|                |        | OTU12862 | 2526      | norank_c__TK10               | Chloroflexi     | 0.019                  | 0.443                | 48     |
|                |        | OTU11199 | 5405      | norank_o__Acidimicrobiales   | Actinobacteria  | 0.025                  | 0.439                | 47     |
| Rainforest     | Dry    | OTU11388 | 3403      | norank_c__Acidobacteria      | Acidobacteria   | 0.030                  | 0.448                | 50     |
|                |        | OTU13452 | 3618      | Isosphaera                   | Planctomycetes  | 0.028                  | 0.422                | 50     |
|                |        | OTU11373 | 50724     | norank_c__Acidobacteria      | Acidobacteria   | 0.017                  | 0.424                | 47     |
|                |        | OTU12812 | 17787     | Mycobacterium                | Actinobacteria  | 0.028                  | 0.423                | 47     |
|                |        | OTU12831 | 1892      | norank_f__Planctomycetaceae  | Planctomycetes  | 0.019                  | 0.422                | 47     |
| Rubber         | Rainy  | OTU12588 | 2428      | Iamia                        | Actinobacteria  | 0.018                  | 0.498                | 78     |
|                |        | OTU7139  | 1714      | norank_f__Nitrosomonadaceae  | Proteobacteria  | 0.012                  | 0.488                | 76     |
|                |        | OTU8355  | 15140     | norank_f__Nitrosomonadaceae  | Proteobacteria  | 0.008                  | 0.485                | 73     |
| Tropical       | Rainy  | OTU11373 | 45930     | norank_c__Acidobacteria      | Acidobacteria   | 0.019                  | 0.510                | 88     |
|                |        | OTU11421 | 5437      | Candidatus_Xiphinematobacter | Verrucomicrobia | 0.011                  | 0.504                | 79     |
|                |        | OTU2626  | 26970     | norank_c__Acidobacteria      | Acidobacteria   | 0.012                  | 0.497                | 78     |
|                |        | OTU12996 | 8087      | Candidatus_Xiphinematobacter | Proteobacteria  | 0.011                  | 0.501                | 77     |
|                |        | OTU8228  | 6839      | norank_c__Acidobacteria      | Acidobacteria   | 0.011                  | 0.492                | 77     |
|                |        | OTU2133  | 3464      | H16                          | Proteobacteria  | 0.016                  | 0.513                | 76     |
|                |        | OTU11388 | 3390      | norank_c__Acidobacteria      | Acidobacteria   | 0.018                  | 0.508                | 75     |

60 **Table S4** Keystone fungal taxa in the overall network. Keystones were selected on the basis of high degree, high closeness centrality and low  
61 betweenness centrality (for dry season: cut-off: degree >25 and CC >0.25 and BC < 0.06, for rainy season: cut-off: degree >30 and CC >0.32 and  
62 BC <0.040) according to Berry and Widder (2014).

| Forest systems | Season | OTU ID  | Abundance | Genus                          | Phylum         | Betweenness Centrality | Closeness Centrality | Degree |
|----------------|--------|---------|-----------|--------------------------------|----------------|------------------------|----------------------|--------|
| Rubber         | Dry    | OTU1965 | 9341      | Clitopilus                     | Basidiomycota  | 0.060                  | 0.290                | 32     |
|                |        | OTU2200 | 6757      | unclassified                   | unclassified   | 0.052                  | 0.289                | 28     |
| Rainforest     | Dry    | OTU7656 | 4373      | unclassified_f__Thelephoraceae | Basidiomycota; | 0.048                  | 0.306                | 26     |
| Rubber         | Rainy  | OTU5009 | 2362      | unclassified                   | unclassified   | 0.022                  | 0.323                | 31     |
|                |        | OTU4781 | 3421      | Mortierella                    | Zygomycota     | 0.1417                 | 0.354                | 30     |
|                |        | OTU5180 | 1719      | unclassified_p__Ascomycota     | Ascomycota     | 0.015                  | 0.321                | 29     |
|                |        | OTU2200 | 5201      | unclassified                   | unclassified   | 0.068                  | 0.337                | 28     |
|                |        | OTU5403 | 1789      | Magnaporthe                    | Ascomycota     | 0.011                  | 0.320                | 28     |
|                |        | OTU5846 | 1485      | unclassified_c__Leotiomycetes  | Ascomycota     | 0.012                  | 0.325                | 27     |
|                |        | OTU4425 | 9770      | unclassified                   | unclassified   | 0.011                  | 0.314                | 27     |
|                |        | OTU4250 | 3463      | unclassified                   | unclassified   | 0.009                  | 0.307                | 27     |
|                |        | OTU6498 | 12083     | unclassified_p__Ascomycota     | Ascomycota     | 0.055                  | 0.296                | 27     |
|                |        | OTU1965 | 5951      | Clitopilus                     | Basidiomycota  | 0.046                  | 0.325                | 26     |
|                |        | OTU5761 | 3945      | unclassified                   | unclassified   | 0.009                  | 0.319                | 26     |
|                |        | OTU5590 | 3691      | unclassified_o__Pleosporales   | Ascomycota     | 0.008                  | 0.317                | 26     |
|                |        | OTU4323 | 5781 5781 | unclassified                   | unclassified   | 0.015                  | 0.309                | 26     |
|                |        | OTU994  | 5828      | unclassified                   | unclassified   | 0.020                  | 0.293                | 26     |
|                |        | OTU4659 | 4215      | unclassified_o__Sordariales    | Ascomycota     | 0.012                  | 0.285                | 26     |
| Rainforest     | Rainy  |         |           |                                |                |                        |                      |        |

|          |      |                                 |              |       |       |    |
|----------|------|---------------------------------|--------------|-------|-------|----|
| OTU10963 | 4510 | Neobulgaria                     | Ascomycota   | 0.032 | 0.205 | 32 |
| OTU11424 | 1413 | unclassified_f__Pezizaceae      | Ascomycota   | 0.032 | 0.205 | 32 |
| OTU10509 | 1200 | unclassified_c__Sordariomycetes | Ascomycota   | 0.040 | 0.204 | 32 |
| OTU10426 | 1105 | unclassified_c__Sordariomycetes | Ascomycota   | 0.025 | 0.024 | 30 |
| OTU11839 | 1086 | unclassified                    | unclassified | 0.035 | 0.204 | 28 |
| OTU3670  | 1181 | Pyrenochaetopsis                | Ascomycota   | 0.036 | 0.204 | 27 |



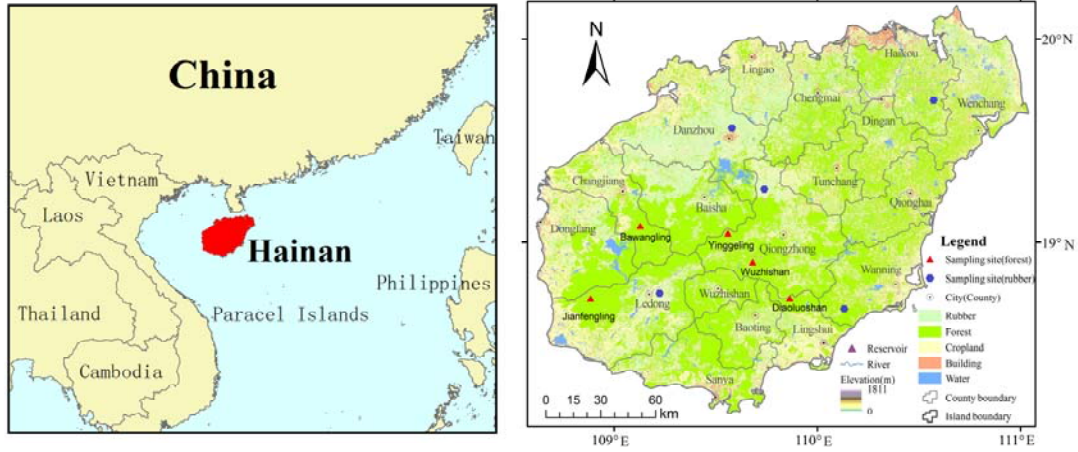

**Figure S1** Rainforest (blue solid hexagons) and rubber plantation (red solid triangles) study sites on Hainan Island.

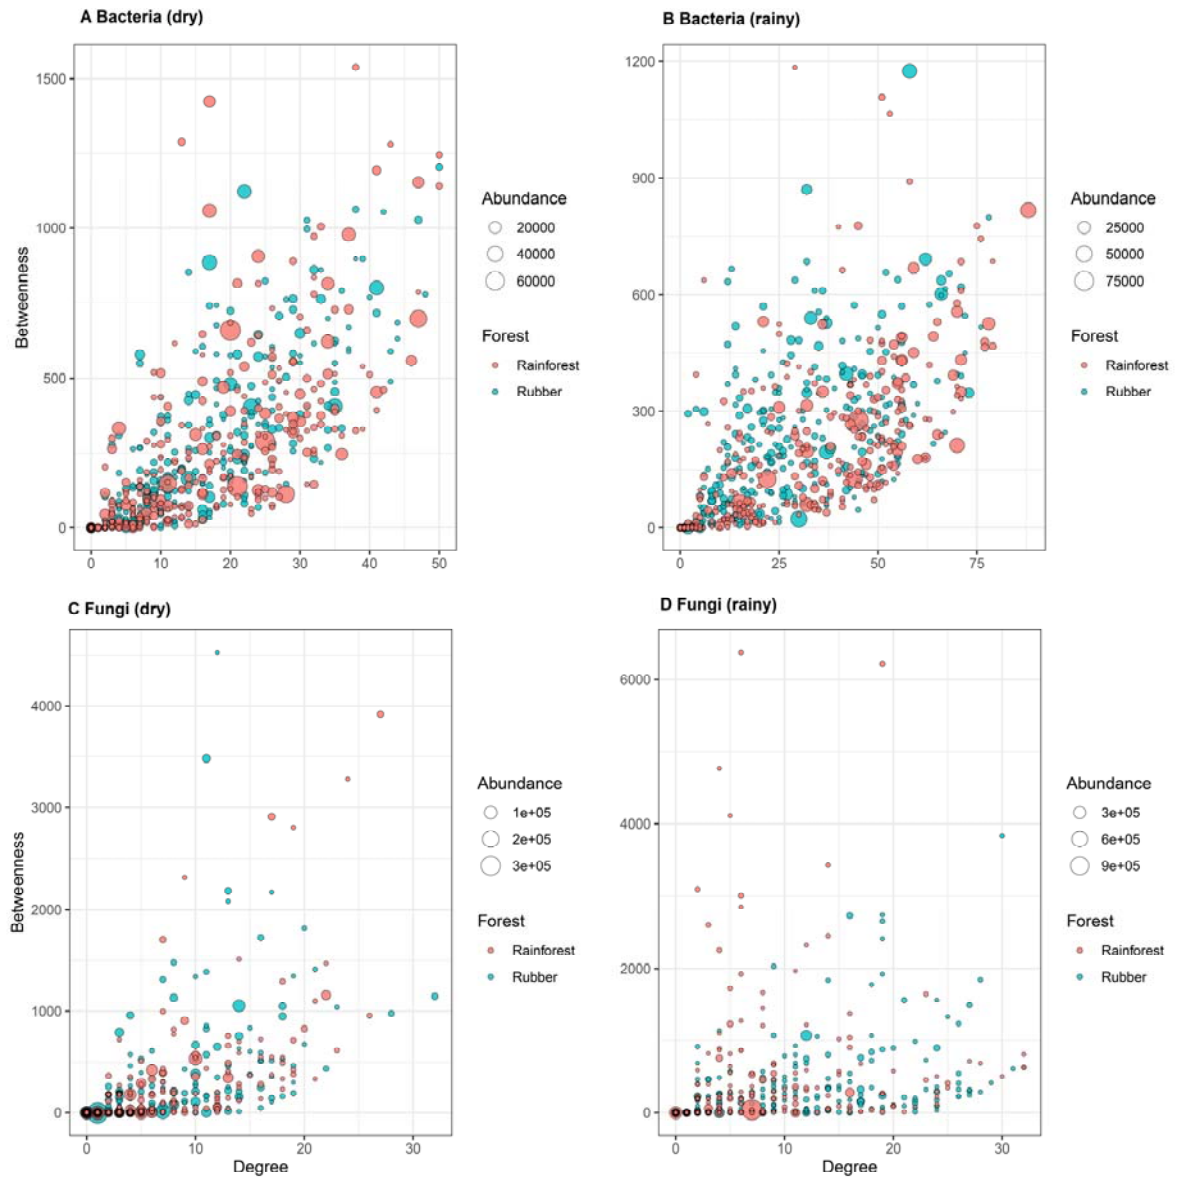

**Figure S2** Relationship between network properties and OTU abundance of rubber plantations and tropical rainforests across season. The size of the node indicates the OTU abundance.

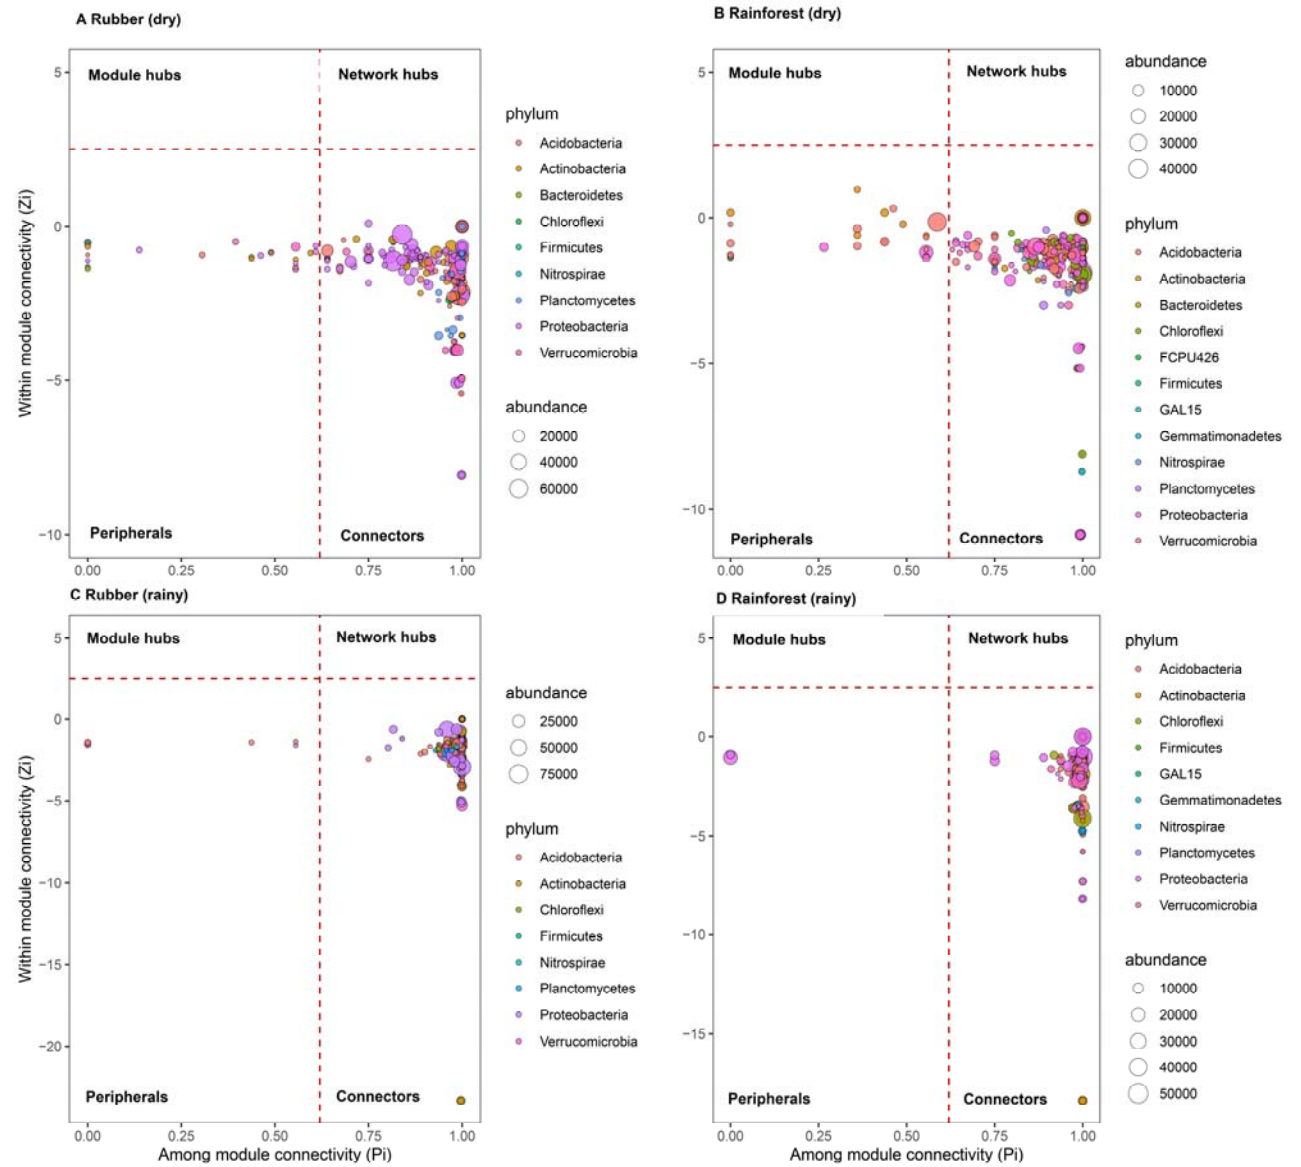

**Figure S3**  $Z_i$ - $P_i$  plot showing the topological distribution of OTUs in the bacterial networks. Each point represents a fungal OTU. Threshold values of  $Z_i$  and  $P_i$  for classification are 2.5 and 0.62, respectively. The size of the node indicates the OTU abundance.

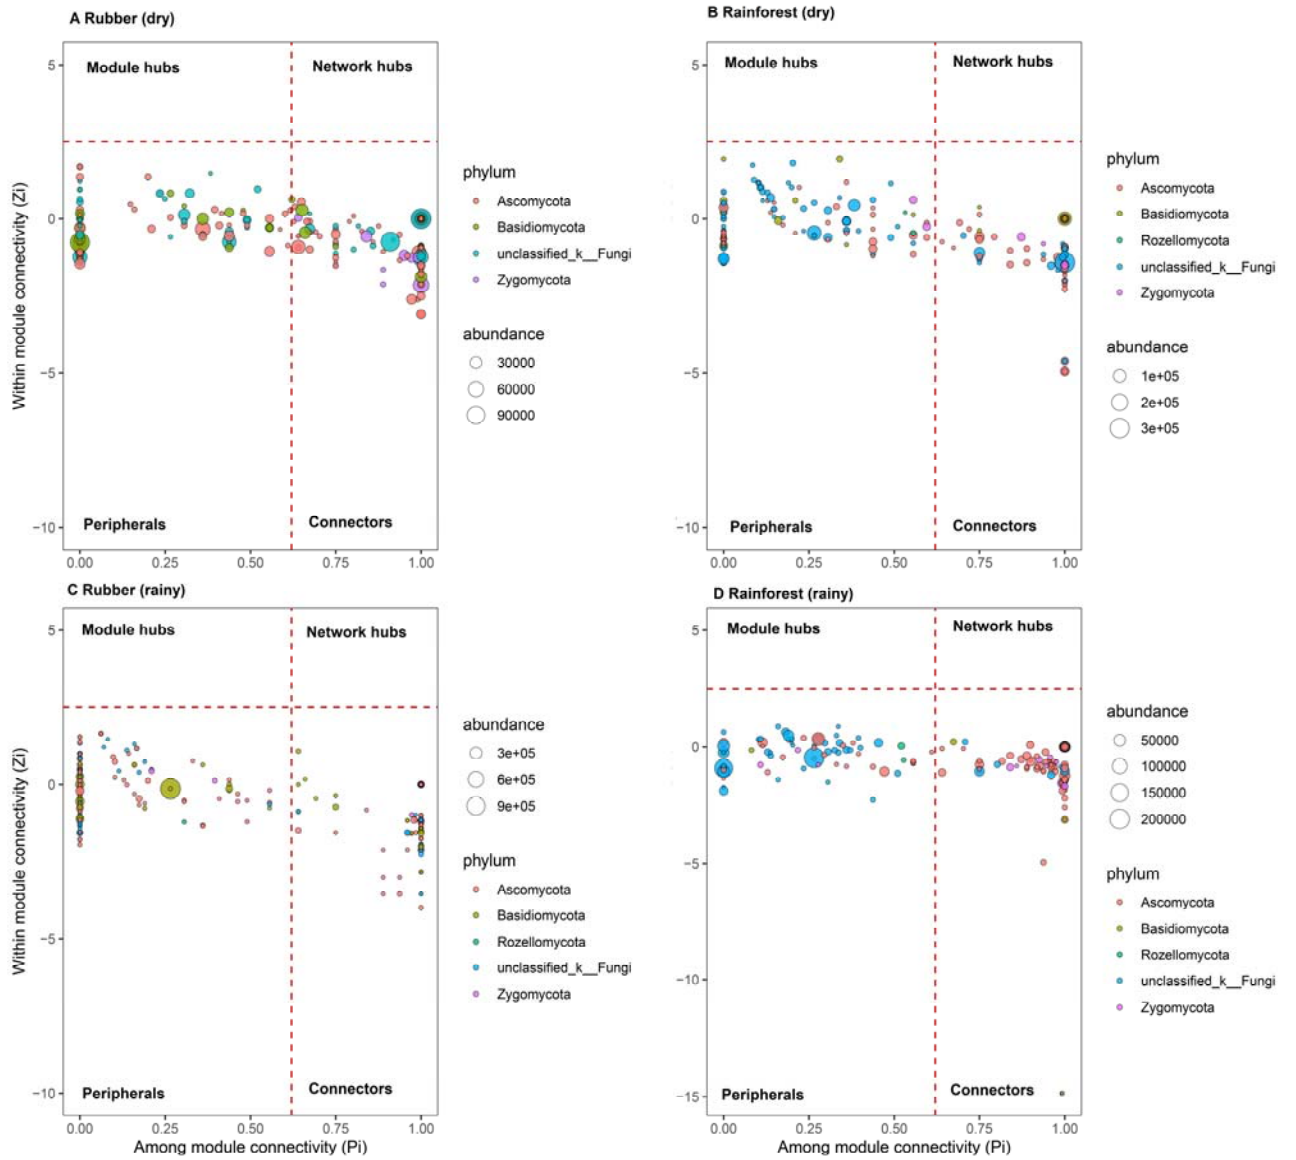

**Figure S4**  $Z_i$ - $P_i$  plot showing the topological distribution of OTUs in the fungal networks. Each point represents a fungal OTU. Threshold values of  $Z_i$  and  $P_i$  for classification are 2.5 and 0.62, respectively. The size of the node indicates the OTU abundance.

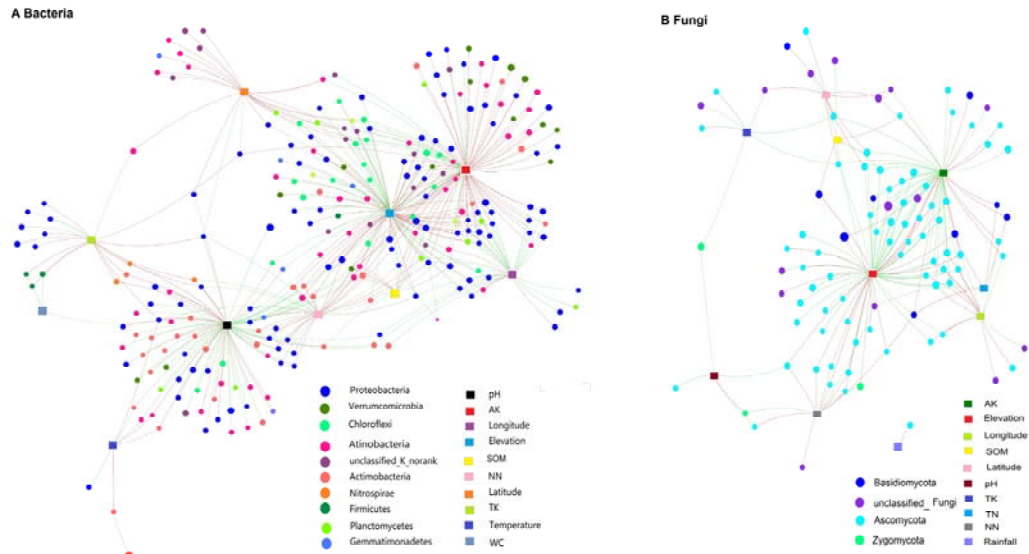

**Figure S5** Two ways correlation network of top 500 abundant bacterial (A) and fungal (B) OTU and environmental factors. The size of the node indicates the OTU abundance. Red line indicates positive correlation between species/functions, and green indicates negative correlation. Absolute value of correlation coefficient  $> 0.5$ ,  $P < 0.01$ .

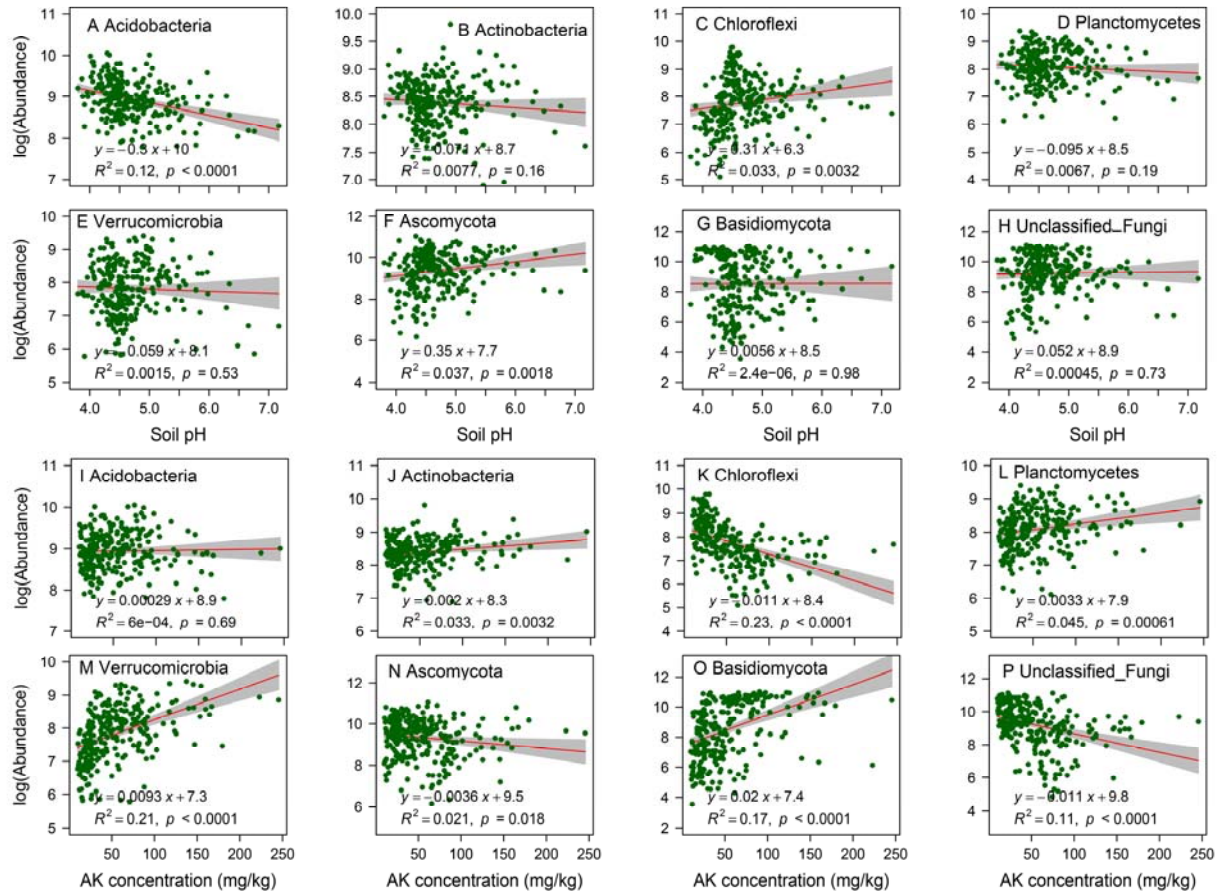

**Figure S6** Relationship between abundance of phylum (bacteria: A-E, I-M; fungi: F-H, N-P) and soil properties (Soil pH: A-H; AK (available potassium) concentration: I-P)



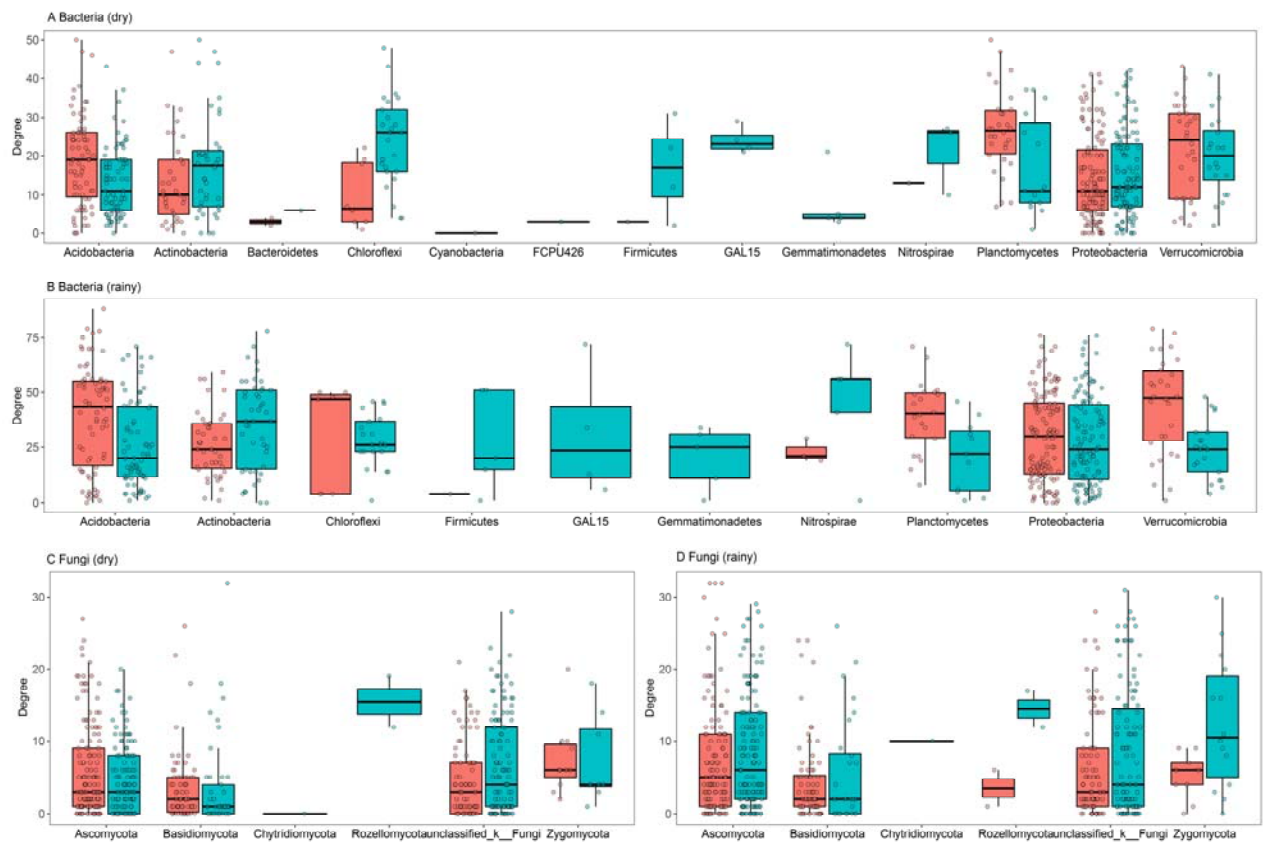

**Figure S7** Network degree of soil bacterial and fungal community of rubber plantations (blue) and tropical rainforest (red) in the dry and rainy season (A: bacteria in dry season, B: bacteria in rainy season, C: fungal in dry season, D: fungal in rainy season)

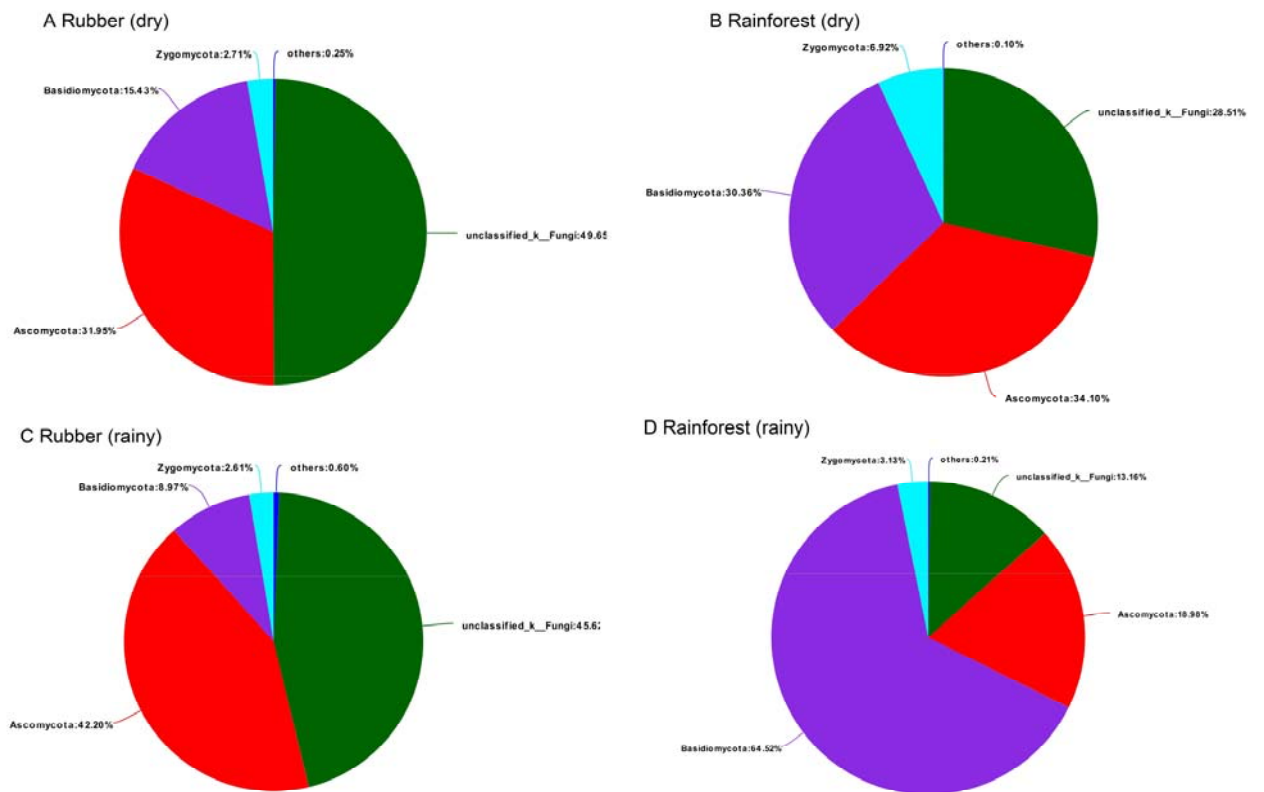

**Figure S8** Phylum composition of soil fungal community of rubber plantations and tropical rainforests across seasons.



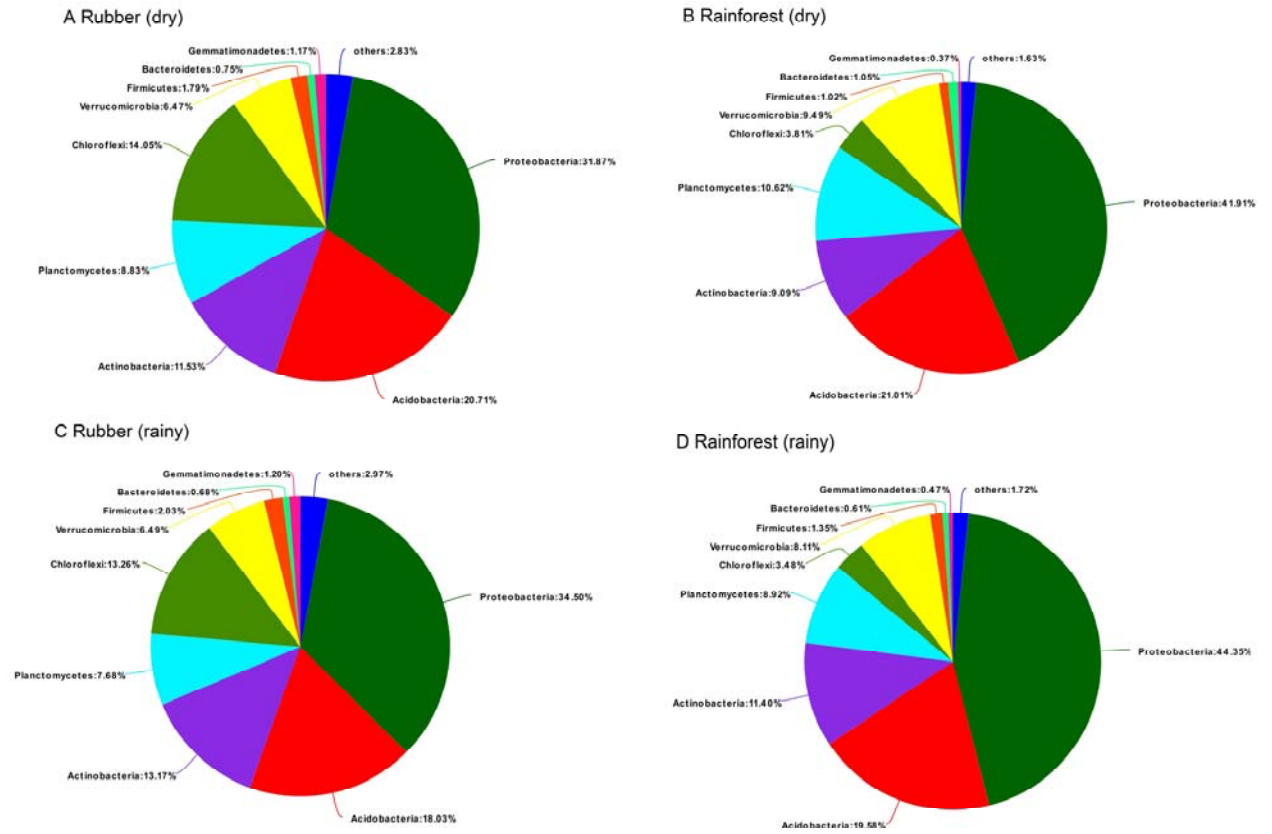

**Figure S9** Phylum composition of soil bacterial community of rubber plantations and tropical rainforests across seasons.
